# Supplementary material
Source: publisher figshare collection journal article supplement (https://frontiersin.figshare.com/ndownloader/files/12981434)
Supplement: Supplementary file 1 [file 12981434]

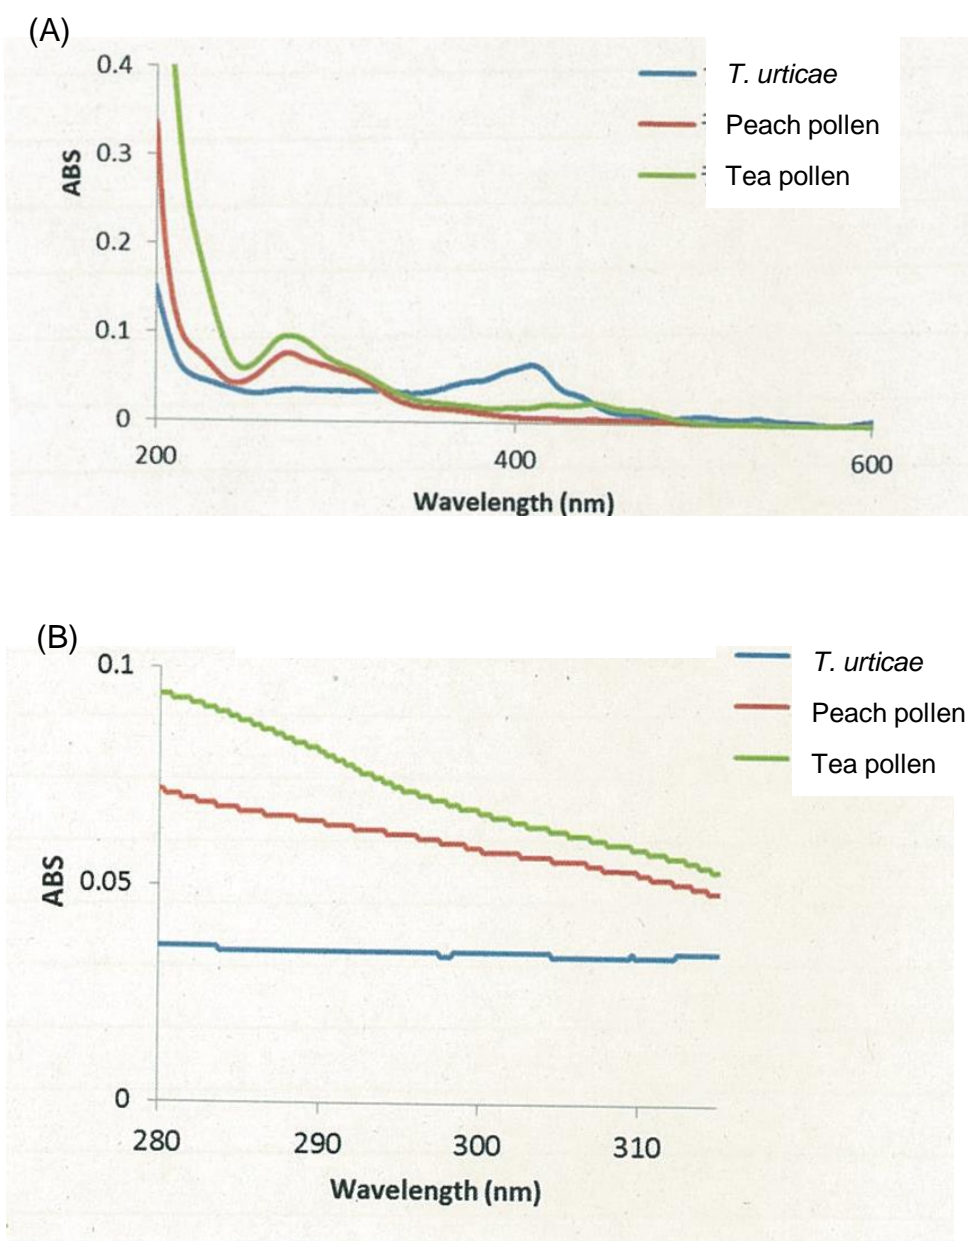

Figure S5. UV-Vis (A) and UV-B (B) spectra of the extracts (10  $\mu\text{g/ml}$  MeOH) from *T. urticae*, peach pollen and tea pollen.
